# Supplementary material for: A New Positron Emission Tomography Probe for Orexin Receptors Neuroimaging
Source: PubMed Central journal article supplement (PMC7179119; doi:10.3390/molecules25051018), 2020-02-25
Supplement: molecules-25-01018-s001.pdf [file molecules-25-01018-s001.pdf]

## A New Positron Emission Tomography Probe for Orexin Receptors Neuroimaging

Ping Bai<sup>1,2,3</sup>, Sha Bai<sup>2</sup>, Michael S. Placzek<sup>2</sup>, Stephanie A. Fiedler<sup>2</sup>, Brenda Ntaganda<sup>2</sup>, Hsiao-Ying Wey<sup>2,\*</sup>,  
Changning Wang<sup>2,\*</sup>

<sup>1</sup>Chengdu Institute of Biology, Chinese Academy of Sciences, Chengdu 610041, PR China

<sup>2</sup>Athinoula A. Martinos Center for Biomedical Imaging, Department of Radiology, Massachusetts General Hospital, Harvard Medical School, Charlestown, MA 02129, USA

<sup>3</sup>University of Chinese Academy of Sciences, Beijing 100049, PR China

\*To whom correspondence should be addressed:

Changning Wang, PhD

Martinos Center for Biomedical Imaging at Massachusetts General Hospital, Harvard Medical School

149 13th Street, Suite 2301

Charlestown, MA 02129

[cwang15@mgh.harvard.edu](mailto:cwang15@mgh.harvard.edu)

Hsiao-Ying Wey, PhD

Martinos Center for Biomedical Imaging at Massachusetts General Hospital, Harvard Medical School

149 13th Street, Suite 2301

Charlestown, MA 02129

[HsiaoYing.Wey@mgh.harvard.edu](mailto:HsiaoYing.Wey@mgh.harvard.edu)

**Fig. S1. Representative <sup>1</sup>H, <sup>13</sup>C NMR and HPLC data for CW24.**





Table S1. Off binding data of CW24.

The off-target binding assays were performed at PDSP with their standard protocol (<https://pdspdb.unc.edu/pdspWeb/content/UNC-CH%20Protocol%20Book.pdf>). In radioligand binding assays, CW24 was tested at a single concentration (10  $\mu$ M) and in quadruplicate in 96-well plates. The binding assays were carried out in a final volume of 125  $\mu$ l per well in appropriate binding buffers. The hot ligand concentration is usually at a concentration close to the  $K_d$  (unless otherwise indicated). Total binding and nonspecific binding are determined in the absence and presence of 10  $\mu$ M of the appropriate reference compound, respectively. In brief, plates are usually incubated at room temperature and in the dark for 90 mins. Reactions are stopped by vacuum filtration onto 0.3% polyethyleneimine (PEI) soaked 96-well filter mats using a 96-well Filtermate harvester, followed by three washes with cold wash buffers (for details, see Tables 2 to 24). Scintillation cocktail is then melted onto the microwave-dried filters on a hot plate and radioactivity is counted in a Microbeta counter.

| Receptor | % Inhibition 1 | % Inhibition 2 | % Inhibition 3 | % Inhibition 4 | Mean $\pm$ SD % inhibition |
|----------|----------------|----------------|----------------|----------------|----------------------------|
| 5-HT1A   | -4.55          | -4.08          | -22.12         | -9.84          | -10.15 $\pm$ 8.4           |
| 5-HT1B   | 18.96          | 17.99          | 6.23           | 10.41          | 13.4 $\pm$ 6.1             |
| 5-HT1D   | 32.06          | 19.98          | 11.86          | 30.24          | 23.54 $\pm$ 9.4            |
| 5-HT1E   | 31.33          | 19.5           | 22.46          | 2.07           | 18.84 $\pm$ 12.2           |
| 5-HT2A   | 25.7           | 20.15          | 12.75          | -9.45          | 12.29 $\pm$ 15.4           |
| 5-HT2B   | 45.92          | 11.35          | 11.15          | 17.78          | 21.55 $\pm$ 7.7            |
| 5-HT2C   | 28.83          | -38.5          | 8.5            | 58.2           | 14.26 $\pm$ 40.6           |
| 5-HT3    | -7.18          | 2.23           | -23.93         | 12.89          | -4 $\pm$ 15.6              |
| 5-HT5A   | 5.59           | -6.33          | -13.11         | -3.89          | -4.44 $\pm$ 7.73           |
| 5-HT6    | 17.7           | 23.24          | -12.28         | -5.73          | 5.73 $\pm$ 17.3            |

|         |        |        |        |        |               |
|---------|--------|--------|--------|--------|---------------|
| 5-HT7A  | -92.69 | -50.78 | -54.31 | -21.23 | -54.75 ± 29.3 |
| Alpha1A | 17     | -16.24 | -17.64 | -15.07 | -7.99 ± 16.7  |
| Alpha1B | -6.11  | -16.27 | -36.74 | -23.55 | -20.67 ± 12.8 |
| Alpha1D | 6.91   | -32.75 | -9.43  | -19.42 | -13.67 ± 16.7 |
| Alpha2B | -8.15  | -23.65 | -14.5  | 8.29   | -9.5 ± 13.4   |
| Alpha2C | 38.57  | 2.3    | -9.91  | 13.27  | 11.06 ± 20.6  |
| Beta2   | -12.23 | -5.09  | -7.41  | -17.26 | -10.5 ± 5.4   |
| D1      | 22.73  | -0.84  | 21.85  | 28.02  | 17.94 ± 12.8  |
| D2      | -8.12  | 21.42  | -24.23 | 4.13   | -1.7 ± 19.3   |
| D3      | 3.09   | -9.41  | -6.79  | -6.5   | -4.9 ± 5.5    |
| D4      | 73.21  | 69.99  | 60.34  | 65.33  | 67.22 ± 5.6   |
| D5      | 4.57   | -5.32  | 7.05   | 55.75  | 15.51 ± 27.3  |
| DAT     | -0.27  | -4.72  | 8.47   | 14.9   | 4.6 ± 8.8     |
| DOR     | 41.02  | 8.06   | 10.63  | -3.98  | 13.93 ± 19.1  |
| GABAA   | 24.87  | 0.04   | 4      | 17.31  | 11.56 ± 11.5  |
| H1      | 13     | -0.52  | 1.94   | 27.5   | 10.48 ± 12.7  |
| H2      | 25.4   | 24.43  | 24.78  | 22.12  | 24.18 ± 1.43  |
| H3      | -25    | -12.5  | 0      | 0      | -9.38 ± 11.92 |
| H4      | -8.25  | 9.91   | 8.32   | 3.76   | 3.44 ± 8.21   |
| M1      | 17.45  | -8.79  | -6.38  | -1.13  | 0.29 ± 11.93  |
| M2      | -1.12  | -4.61  | -17.35 | 22.75  | -0.08 ± 16.71 |
| M3      | -5.69  | -3.65  | -12.4  | -16.48 | -9.56 ± 5.94  |
| M4      | 0.88   | -23.89 | -3.92  | 11.5   | -3.86 ± 14.83 |
| M5      | 15.35  | 31.89  | 40.55  | 21.65  | 27.36 ± 11.13 |
| MOR     | 5.06   | -11.35 | 8.74   | -10.61 | -2.04 ± 10.43 |

|         |       |       |       |       |               |
|---------|-------|-------|-------|-------|---------------|
| SERT    | 10.62 | -3.59 | 10.62 | 25.65 | 10.83 ± 11.94 |
| Sigma 1 | 8.39  | 1.56  | 8.99  | 30.38 | 12.33 ± 12.50 |
| Sigma 2 | 42.39 | 19.45 | 26.56 | 20.46 | 27.22 ± 10.59 |
